### NW Ulster

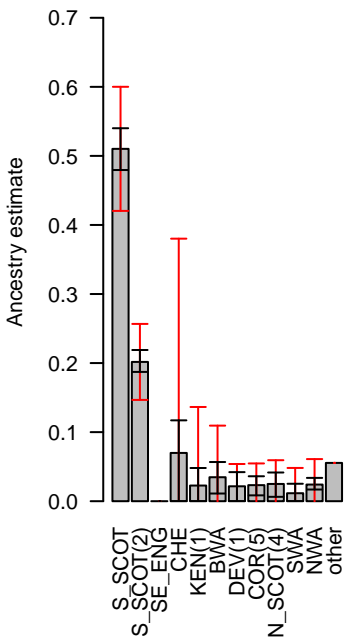

### N Leinster/Ulster

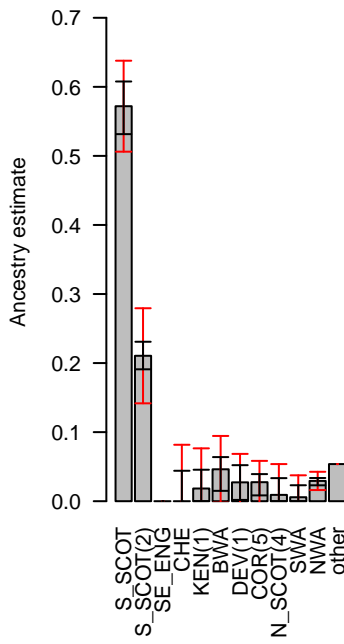

### Connacht

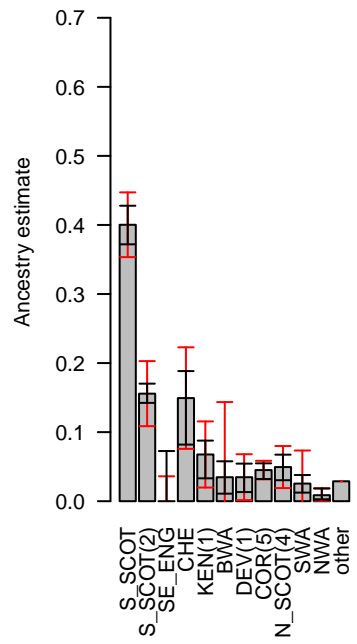

### Central Leinster

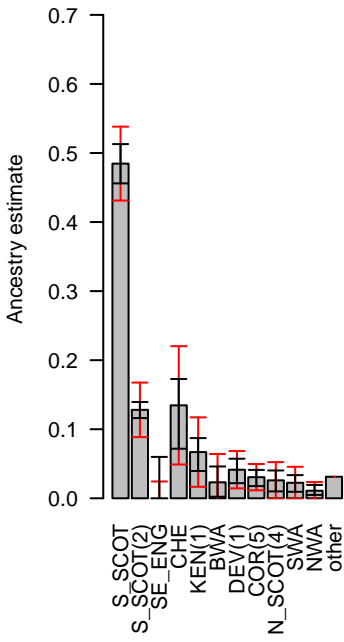

### S Leinster/Munster

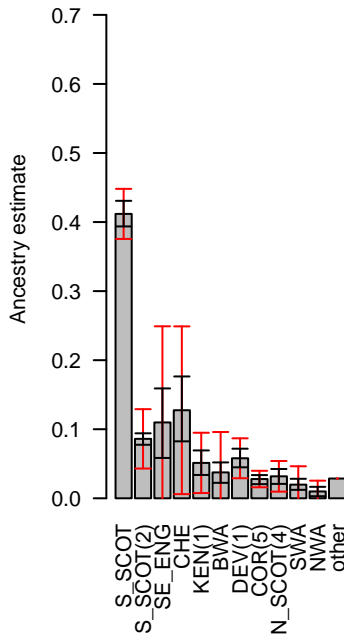

### Wexford

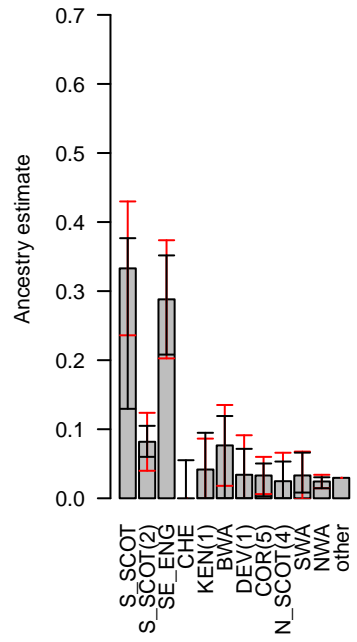

### N Munster

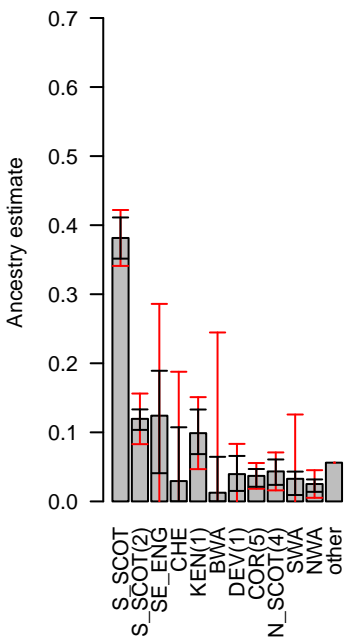

### SW Munster

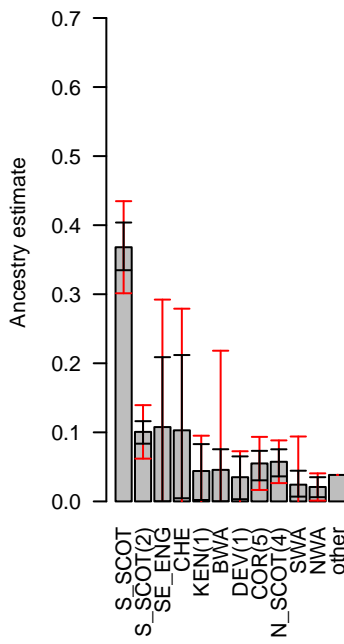

### Cork

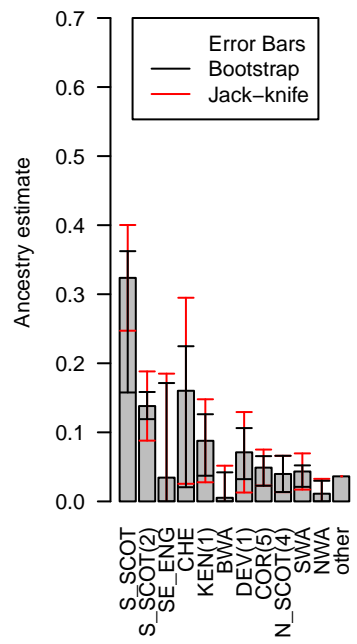

Legend:  
— Error Bars  
— Bootstrap  
— Jack-knife
